# Supplementary material
Source: PubMed Central journal article supplement (PMC524349)
Supplement: 7600417s1.pdf [file 7600417s1.pdf]

### Supplementary Figure S1

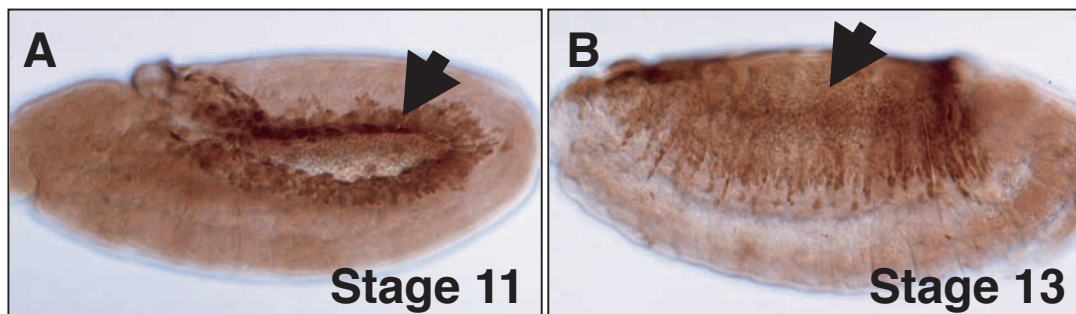

**Supplementary Figure S1. Expression of Pnr-GAL4 during Embryogenesis.** Embryos of genotype *pnr-GAL4/UAS-lacZ* were stained with anti-LacZ antibody. *pnr-GAL4* is expressed in the dorsalmost cells of the lateral ectoderm (including LE cells) (Stage 11) and also in the amnioserosa (Stage 13) during embryogenesis (marked with arrows).
