# Supplementary material
Source: PubMed Central journal article supplement (PMC524349)
Supplement: 7600417s2.pdf [file 7600417s2.pdf]

## Supplementary Figure S2

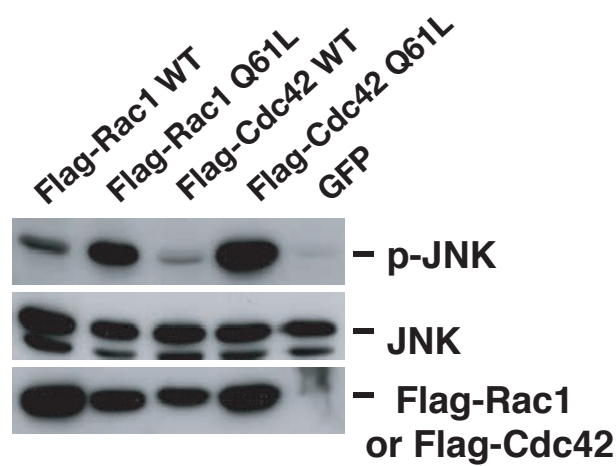

**Supplementary Figure S2. Expression of Constitutively Activated Forms of Rac1 and Cdc42 Activates JNK in S2 Cells.** S2 cells stably transfected with pMT/V5-His A constructs of wild-type molecules (Flag-Rac1 WT, Flag-Cdc42 WT) or constitutively activated mutants (Flag-Rac1 Q61L, Flag-Cdc42 Q61L) were serum-starved overnight. Then, expression of transgenes was induced for 5 hours by the addition 100 mg/ml CuSO<sub>4</sub>. Cellular lysates were subjected to Western analysis using antibodies against p-JNK and JNK1. The expression of transgenic molecules was monitored by anti-Flag blotting. The pMT GFP was used for the control transfected line.
