# Supplementary material
Source: PubMed Central journal article supplement (PMC524349)
Supplement: 7600417s3.pdf [file 7600417s3.pdf]

### Supplementary Figure S3

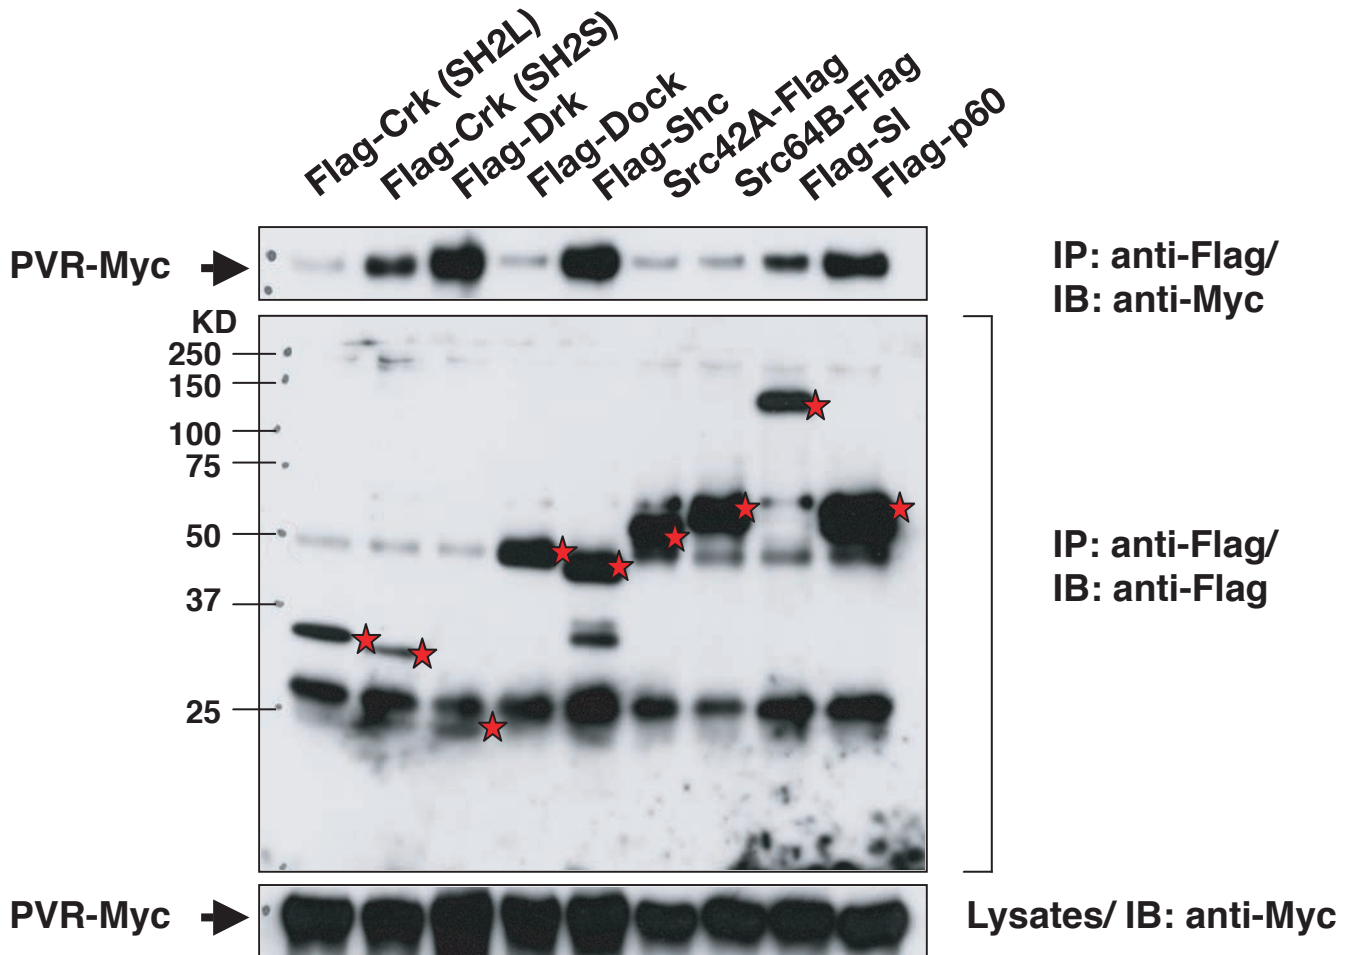

**Supplementary Figure S3. Biochemical Interaction of PVR with SH2- and PTB-Domain Containing Molecules.** Myc-tagged PVR (PVR-Myc) molecules were transiently expressed in S2 cells along with Flag-tagged SH2- or PTB-domain-containing molecules whose mammalian homologs directly bind to PDGFRs. Immunoprecipitation with anti-Flag was performed with S2 cells transfected with *Pvr-Myc* and Flag-tagged constructs of *Crk* (SH2L), *Crk* (SH2S), *Drk*, *Dock*, *Shc*, *Src42A*, *Src64B*, *Sl* or *p60*. All constructs were in the pUAST vector and used for cotransfection with pWAGAL4. By use of the GAL4/UAS system, PVR-Myc was highly expressed and consequently autophosphorylated (Figure 5B, fifth panel). Western blot analysis of the resultant precipitates was performed with anti-Myc antibody. The same blot was then stripped and reprobbed with anti-Flag to monitor precipitated Flag-tagged molecules (marked with stars). Immunoblotting of total lysates indicates the expression of PVR-Myc.
