# Supplementary material
Source: PubMed Central journal article supplement (PMC524349)
Supplement: 7600417s4.pdf [file 7600417s4.pdf]

**A**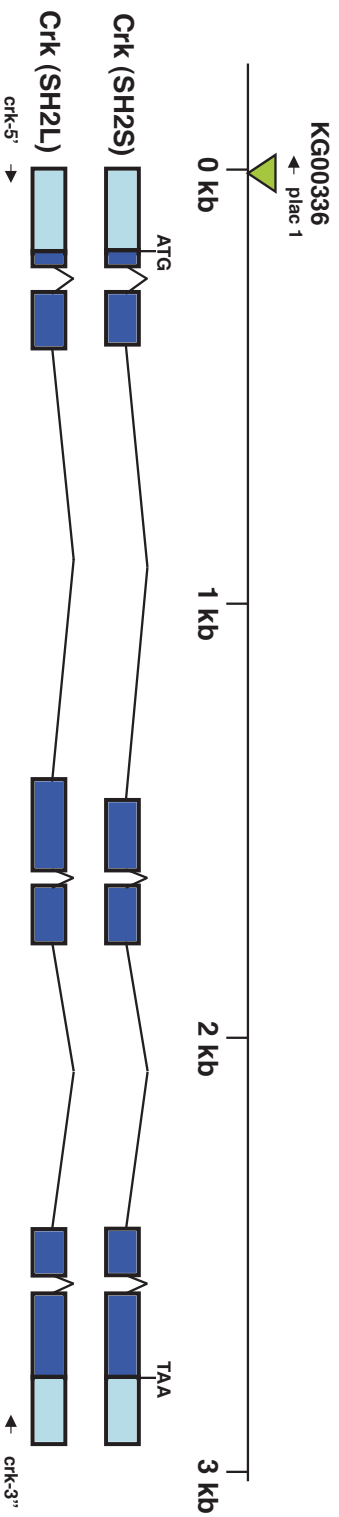**Supplementary Figure S4****B**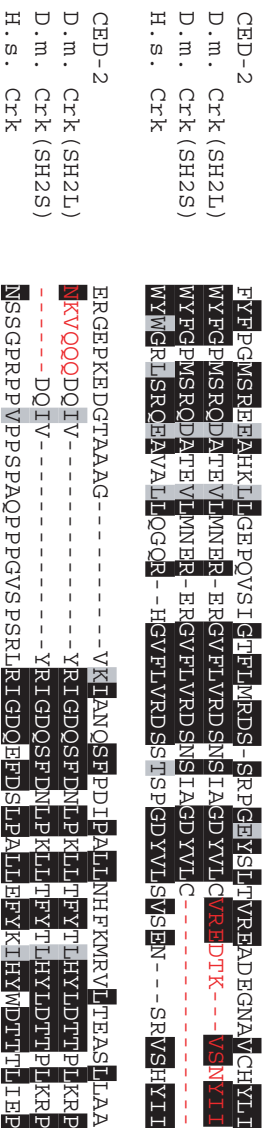**C**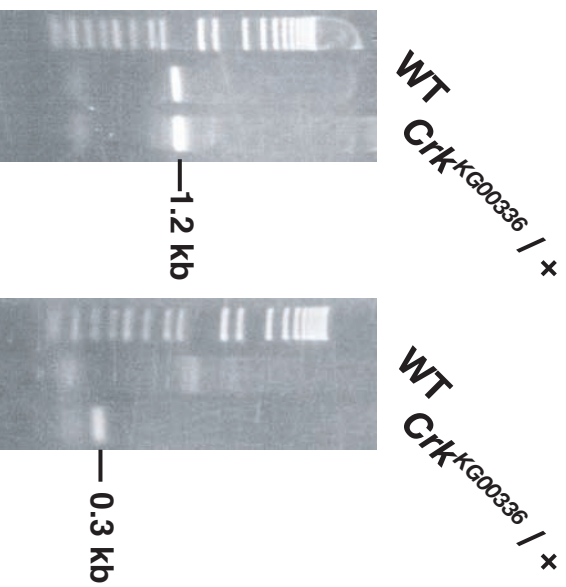

**Primers:** **Crk 5' & 3'** **Crk 5' & plac1**

**Supplementary Figure S4. The KG00336 P Element Insertion Site Is Mapped in the Crk Exon One. (A)** Schematic representation of *Crk* transcripts. The KG00336 insert, which is shown as an inverted triangle, is located 40 bp downstream of the *Crk* transcription initiation site. *Crk* (*SH2L*) and *Crk* (*SH2S*) use altered donor- and acceptor-sites for splicing out intron 2, making *Crk* molecules composed of SH2 domains of different size. Positions of Crk-5', Crk-3", and plac1 primers used for RT-PCR (see Panel C) are shown by arrows.

**(B)** Alignment of the SH2 domain sequences of *C. elegans* CED-2, *Drosophila* Crk (SH2L), *Drosophila* Crk (SH2S), and human Crk. Residues conserved in 3 or 4 proteins are boxed in black. Similar residues are boxed in gray. Red letters indicates the 18 amino acid residues of Crk (SH2L) that are absent in Crk (SH2S). **(C)** Insertion of KG00336 P element causes chimeric transcripts between Crk and the P element, SuPor-P. Poly A+ RNA derived from wild type and the KG00336 heterozygote were reverse-transcribed using a SMART cDNA Synthesis Kit, (Clontech). RT-PCR was performed using primers Crk-5' (5'-CGATCAAAACATTATCGATAGTGTTCCTAATG-3') and Crk-3" (5'-CTGATTATGTTAACCAAITGGTATGCACAAC-3') and Crk-5' left panel) or Crk-5' and plac1 (5'-CACCACAAGGCTCTGCCACAAT-3'; right panel). Crk-5' and plac1 primers amplified a DNA fragment containing 5'-end sequence of Crk fused to the sequence of SuPor-P when cDNA pools originated from KG00336 heterozygotes were used for the RT-PCR template (sequence data not shown).
