# Supplementary material
Source: PubMed Central journal article supplement (PMC524349)
Supplement: 7600417s6.pdf [file 7600417s6.pdf]

## Supplementary Figure S6

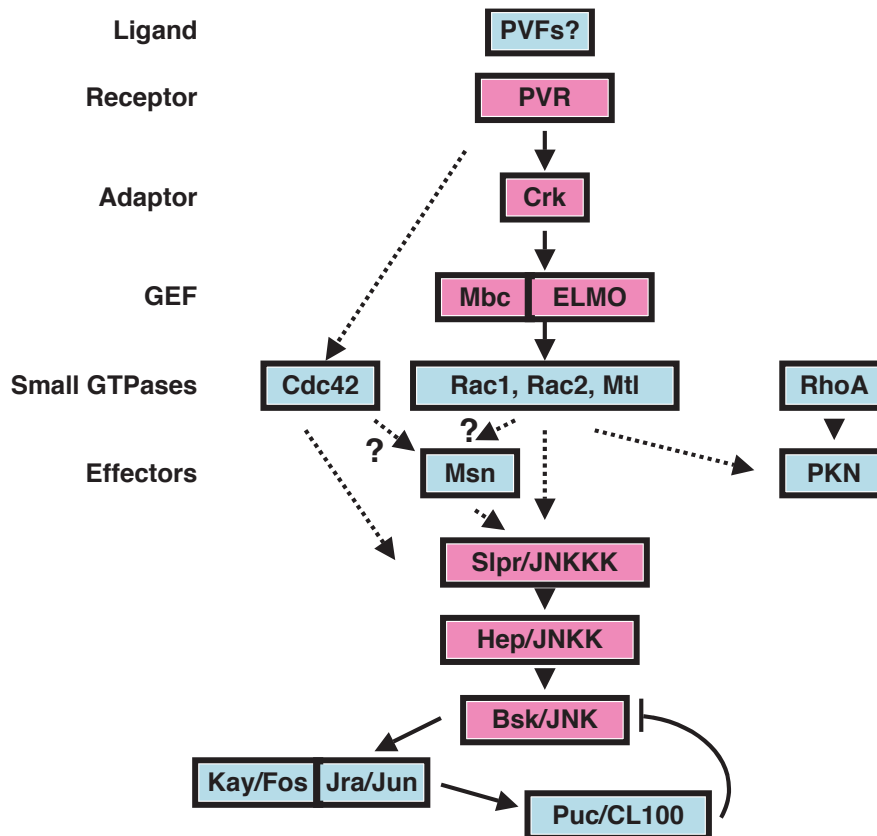

**Supplementary Figure S6. Schematic Representation of the Signaling Pathways Mediated by PVR during TC.** Activation of PVR by its PVF ligand(s) leads to activation of the JNK pathway through Rac and Cdc42. Genetic interaction experiments suggest that Mbc is an upstream activator of Rac GTPases (data not shown). We found that RNAi against *Pvr*, *Crk*, *mbc*, *ELMO*, *slpr* (data not shown), *hep*, and *bsk* caused TC defects (highlighted in pinkish color).
